# Supplementary material
Source: publisher figshare collection journal article supplement (https://sage.figshare.com/ndownloader/files/17682377)
Supplement: Supplementary file 1 [file 17682377]

Appendix A  
Interview Protocols

Hello, thanks for participating in the interviews. My name is \_\_\_\_ I am a second year PhD student. The interview will take 30-45 minutes, with a questionnaire that will be emailed to you to fill out at your convenience. The purpose is to understand the perceptions and experiences of your academic and athletic career. There are no desirable or undesirable answers, I just want you to answer the questions as honest as possible. Feel comfortable about your answers, I want to know what you really think and how you really feel.

If it is okay with you, I will be typing our conversation. The purpose of this is so I can get all the details about our conversation. All your responses will remain confidential. Before we get started with the interview please take some time to read the consent form.

Thank you so much for participating!

Questions:

1. What is your major?
2. Why did you choose that major?
3. How long have you been playing your sport?
4. How did you get into that sport?
5. How long have you been playing at the institution?
6. What motivates you to participate in your sport?
7. What motivates you to continue studying for your degree?
8. Briefly describe a typical day at school?
9. Before we conclude this interview is there anything else you would like to share?

Questionnaire for Students  
Latino Male Student-Athlete

1. Basic Information  
Name: \_\_\_\_ Year: \_\_\_\_ Major: \_\_\_\_ Sport: \_\_\_\_ Hometown: \_\_\_\_
2. What are your next plans regarding your educational career?
3. What are your next plans regarding your athletic career?
4. How do you describe your experiences with your coaches?
5. How do you describe your experiences with your teammates, and other students?
6. How do you describe your experience with faculty?
7. How do coaches, faculty, and administrators enhance your career development?
8. Do you take classes with your teammates?
9. How often do you attend tutoring hours and office hours?
10. Do your teammates encourage you to attend events to learn about culture?
11. How does the campus create meaningful interactions with people from other cultural backgrounds?
12. What do you believe is the greatest challenge for Latino male Student-Athletes in Higher Education?
